# Supplementary material for: Small Molecule Inhibitors of the LEDGF Site of Human Immunodeficiency Virus Integrase Identified by Fragment Screening and Structure Based Design
Source: PLoS One. 2012 Jul 10;7(7):e40147. doi: 10.1371/journal.pone.0040147 (PMC3393750; doi:10.1371/journal.pone.0040147)
Supplement: Text S1 — Information on the isomerization of compound 1 to 2. (DOC) [file pone.0040147.s002.doc]

**Supporting information:**

**Text S1:**

**Identity and isomerisation of compound 1**

The solid sample **1** was analysed by 1H NMR (400MHz, CDCl3) and the data obtained was consistent with the literature data [S1] and with the designated structure **1** (mixture of diastereomers). In particular, the signals at *ca.* δ 4.0 and δ 4.3 ppm (integrating to one proton) were assigned to the diastereomeric methine protons (-ArCHCO-) of the indanyl moieties for each diastereomer, and the complex multiplet at *ca.* δ 3.5 ppm (integrating to 2 protons) was assigned to the other methylene protons (-ArCH2CO-) of the indanyl ring systems for both diastereomers. The 1H NMR spectrum of a fresh solution of **1** in d6-DMSO showed three sets of signals at *ca.* δ 4.4, 3.6 and 3.4 ppm due to the indanyl methine and methylene protons, indicating that the archived sample, when freshly dissolved in d6-DMSO, was indeed the lactone structure **1** (mixture of diastereomers).

The stability of the lactone **1** in d6-DMSO was studied by 1H NMR spectroscopy. After standing for six hours at ambient temperature, the 1H NMR spectrum of the solution showed signals due to a *ca.* 1:4 mixture of lactone **1** and a new species. After 1 day, the 1H NMR spectrum of the solution showed the signals due to the lactone **1** had almost completely disappeared and had been replaced by signals of the new species. After 5 days at room temperature, there was little further change in appearance of the 1H NMR spectrum of the solution indicating that equilibrium had been achieved. The 1H NMR data for the new species within this mixture was consistent with the acid form **2**, as predominantly one isomer, presumably the *E*-isomer **2** (Scheme 1). In particular, a singlet at *ca.* δ 3.6 ppm (integrating to two protons) was assigned to the indanyl methylene protons (-ArCH2CO-).

These studies indicate that the reason for the acid form **2** binding to the protein in the crystallographic studies, is that, on dissolution of the lactone **1** in DMSO, equilibrium is established between the lactone **1** and the acid **2**, with the latter preferentially binding to the protein. Further work is underway in order to understand this apparent solvent-dependent isomerization and will be reported in due course.

**Scheme S1**

**Supporting Information References:**

Reference S1. Hung TV, Mooney BA, Prager RH, Tippett JM (1981) Central nervous system active compounds. VII. Phthalide synthesis by lithiation of alkoxyaromatics. Australian Journal of Chemistry34: 383 - 395.
